# Supplementary material
Source: PubMed Central journal article supplement (PMC8562579)
Supplement: plantbiotechnology-38-3-21.0727a-s001.pdf [file plantbiotechnology-38-3-21.0727a-s001.pdf]

**WT-A**

TGATATAAACTAACTGTGGTGCATTGCTTGCCTAGATGAAGCACAGTTCAGCTATTTCCGCTGTTTTGAC  
CGATGACAATTCGACAATGGCACCCCTAGAGGAAGATGTCAAGACTGAAAATATTGGCCTCCTAAATTTG  
GATCCAACTTTGGAACCTTATCTAGATCACTTCAGACACAGAATGAAGAGATATGTGGATCAGAAAATGC  
TCATTGAAAAATATGAGGGACCCCTGAGGAATTTGCTCAAGGTAACAGCCAAAAGTTGTGCTTTAGGCA  
GTTTGACCTTATTTGGAAGATGAATTGTTTATACCTACTTTGACTTTGCTAGAGAATTTTGCATACCGG  
GGAGTAAGTAGTGGCTCCATTTAGGTGGCACCTGGCCATTTTTTTGATCTTTTAAAAAGCTGTTTGATTG  
GGTCTTCAAAAAAGTAGACAAGTTTTTTGGAGAAGTGACACACCCCGGAGTGTCAAGTGGCAAAGCAA

**WT-B**

TGATATAAACTAACTGTGGTGCATTGCTTGCCTAGATGAAGCACAGTTCAGCTATTTCCGCTGTTTTGAC  
CGATGACAATTCGACAATGGCACCCCTAGAGGAAGATGTCAAGACTGAAAATATTGGCCTCCTAAATTTG  
GATCCAACTTTGGAACCTTATCTAGATCACTTCAGACACAGAATGAAGAGATATGTGGATCAGAAAATGC  
TCATTGAAAAATATGAGGGACCCCTGAGGAATTTGCTCAAGGTAACAGCCAAAAGTTGTGCTTTAGGCA  
GTTTGACCTTATTTGGAAGATGAATTGTTTATACCTACTTTGACTTTGCTAGAGAATTTTGCATACCGG  
GGAGTAAGTAGTGGCTCCATTTAGGTGGCACCTGGCCATTTTTTTGATCTTTTAAAAAGCTGTTTGATTG  
GGTCTTCAAAAAAGTAGACAAGTTTTTTGGAGAAGTGACACACCCCGGAGTGTCAAGTGGCAAAGCAA

**WT-C**

TGATATAAACTAACTGTGGTGCATTGCTTGCCTAGATGAAGCACAGTTCAGCTATTTCCGCTGTTTTGAC  
CGATGACAATTCGACAATGGCACCCCTAGAGGAAGATGTCAAGACTGAAAATATTGACCTCCTAAATTTG  
GATCCAGCTTTGGAACCTTATCTAGATCACTTCAGATACAGAATGAAGAGATATGTGGATCAGAAAATGC  
TCATTGAAAAATATGAGGGACCCCTGAGGAATTTGCTCAAGGTAACAGCCAAAAGTTGTGCTTTAGGCA  
GTTTGACCTTATTTGGAAGATGAATTGTTTATACCTACTTTAACTTTGCTAGAGAATTTTTCATACCGG  
GGAGTAAGTAGTGGCTCCATTTAGGTGGCACCTGGCCATTTTTTTGATCTTTTAAAAAGCTGTTTGATTG  
GGTCTTCAAAAAAGTAGACAAGTTTTTTGGAGAAGTGACACACCCCGGAGTGTCAAGTGGCAAAGCAA

Supplementary Figure S1. Nucleotide sequences of the region around the target sites in the WT-A, WT-B, and WT-C genomes. PCR primer sites used for sequence analysis are highlighted by yellow-colored letters. Polymorphic nucleotides between WT-A and others are highlighted in green, and those between WT-C and others are highlighted in blue. *Bam*HI sites are shown as red letters. Region for the predicted exon 3 is boxed. Target sites of the gRNAs are underlined.

#30-C (-165)

TGATATAAACTAACTGTGGTGCATTGCTTGCCTAGATGAAGCACAGTTCAGCTATTTCCGCTGTTTTGAC  
CGATGACAATTCGACAATGGCACCCCTA----- 165 nt -----  
-----AAGTTGTGCTTTAGGCA  
GTTTGACCTTATAATTGGAAGATGAATTGTTTATACCTACTTTAACTTTGCTAGAGAATTTTCATACCGG  
GGAGTAAGTAGTGGCTCCATTTAGGTGGCACCTGGCCATTTTTTTCGATCTTTTAAAAAGCTGTTTGATTG  
GGTCTTCAAAAAAGTAGACAAGTTTTTTGGAGAAGTGACACACCCCGGAGTGTCTAGTGGCAAAGCAA

#31-B (-138)

TGATATAAACTAACTGTGGTGCATTGCTTGCCTAGATGAAGCACAGTTCAGCTATTTCCGCTGTTTTGAC  
CGATGACAATTCGACAATGGCACCCCTTGAGGAA----- 138 nt -----  
-----TTTGTCTCAAGGTAACAGCCAAAAGTTGTGCTTTAGGCA  
GTTTGACCTTATAATTGGAAGATGAATTGTTTATACCTACTTTGACTTTGCTAGAGAATTTTCATACCGG  
GGAGTAAGTAGTGGCTCCATTTAGGTGGCACCTGGCCATTTTTTTCGATCTTTTAAAAAGCTGTTTGATTG  
GGTCTTCAAAAAAGTAGACAAGTTTTTTGGAGAAGTGACACACCCCGGAGTGTCTAGTGGCAAAGCAA

#86-B (-138)

TGATATAAACTAACTGTGGTGCATTGCTTGCCTAGATGAAGCACAGTTCAGCTATTTCCGCTGTTTTGAC  
CGATGACAATTCGACAATGGCACCCCT----- 138 nt -----  
TGAGGAATTTGTCTCAAGGTAACAGCCAAAAGTTGTGCTTTAGGCAGTTTGACCTTATAATTGGAAGATGAA  
TTGTTTATACCTACTTTGACTTTGCTAGAGAATTTTCATACCGGGGAGTAAGTAGTGGCTCCATTTAGG  
TGGCACCTGGCCATTTTTTTCGATCTTTTAAAAAGCTGTTTGATTGGGTCTTCAAAAAAGTAGACAAGTT  
TTTTGGAGAAGTGACACACCCCGGAGTGTCTAGTGGCAAAGCAA

#86-C (-165)

TGATATAAACTAACTGTGGTGCATTGCTTGCCTAGATGAAGCACAGTTCAGCTATTTCCGCTGTTTTGAC  
CGATGACAATTCGACAATGGCACCCCTA----- 165 nt -----  
-----AAGTTGTGCTTTAGGCA  
GTTTGACCTTATAATTGGAAGATGAATTGTTTATACCTACTTTAACTTTGCTAGAGAATTTTCATACCGG  
GGAGTAAGTAGTGGCTCCATTTAGGTGGCACCTGGCCATTTTTTTCGATCTTTTAAAAAGCTGTTTGATTG  
GGTCTTCAAAAAAGTAGACAAGTTTTTTGGAGAAGTGACACACCCCGGAGTGTCTAGTGGCAAAGCAA

#99-C (-223, +59)

TGATATAAACTAACTGTGGTGCATTGCTTGCCTAGATGAAGCACAGTTCAGCTATTTCCGCTGTTTTGA-  
----- 223 nt -----TAATTTGTACGTAGCAT  
AGATACATAGACACAAAATGTCCTCCCATTGAGCTAGCCG(59 nt insertion)-----  
-----ATTGGAAGATGAATTGTTTATACCTACTTTAACTTTGCTAGAAAATTTTCATACCGG  
GGAGTAAGTAGGGGCTCCATTTAGGTGGCACCTGGCCATTTTTTTCGATCTTTTAAAAAGCTGTTTGATTG  
GGTCTTCAAAAAAGTAGACAAGTTTTTTGGAGAAGTGACACACCCCGGAGTGTCTAGTGGCAAAGCAA

#115-C (-86)

```
TGATATAAACTAACTGTGGTGCATTGCTTGCCTAGATGAAGCACAGTTCAGCTATTTCCGCTGTTTTGAC
CGATGACAATTCGACAATGGCACCCCTAGAGGAAGATGTCAAGACTGAAAAT----- 86 nt ----GC
TCATTGAAAAATATGAGGGACCCCTGAGGAATTTGCTCAAGGTAACAGCCAAAAGTTGTGCTTTAGGCA
GTTTGACCTTATAATTGGAAGATGAATTGTTTATACCTACTTTAACTTTGCTAGAGAATTTTTCATACCGG
GGAGTAAGTAGTGGCTCCATTTAGGTGGCACCTGGCCATTTTTTTCGATCTTTTAAAAAGCTGTTTGATTG
GGTCTTCAAAAAAGTAGACAAGTTTTTTGGAGAAGTGACACACCCCGGAGTGTTCAGTGGCAAAGCAA
```

#115-C (-108)

```
TGATATAAACTAACTGTGGTGCATTGCTTGCCTAGATGAAGCACAGTTCAGCTATTTCCGCTGTTTTGAC
CGATGACAATTCGACAATGG----- 108 nt -----ATCAGAAAATGC
TCATTGAAAAATATGAGGGACCCCTGAGGAATTTGCTCAAGGTAACAGCCAAAAGTTGTGCTTTAGGCA
GTTTGACCTTATAATTGGAAGATGAATTGTTTATACCTACTTTAACTTTGCTAGAGAATTTTTCATACCGG
GGAGTAAGTAGTGGCTCCATTTAGGTGGCACCTGGCCATTTTTTTCGATCTTTTAAAAAGCTGTTTGATTG
GGTCTTCAAAAAAGTAGACAAGTTTTTTGGAGAAGTGACACACCCCGGAGTGTTCAGTGGCAAAGCAA
```

Supplementary Figure S2. Nucleotide sequences of the mutant genes. PCR primer sites used for sequence analysis are highlighted in yellow. Region for the predicted exon 3 is boxed. Gaps indicate the deletions in the gene. Inserted sequences are shown as blue letters. Polymorphic nucleotides are highlighted in blue and green.

|             |                                                         |     |
|-------------|---------------------------------------------------------|-----|
| Potato SBE3 | MEINFNVLSPKPIRGSPSPSPKVVSSGASRNKICFP SQHSTGLKFGSQERS    | 50  |
| Rice BE1    | MLCLTSSSSSAPAPLLPSLA-----DRPSPGIAGGGGNV                 | 34  |
| Potato SBE3 | WDISSSTPKSRVRKDERMKHSSAISAVLTDNSTMABLEEDVKTENIGLLN      | 100 |
| Rice BE1    | -RLSVVSSPRRSWP GKVKTNF SVPA TARKNKTMVTVV EE -VDHLPI--YD | 80  |
| Potato SBE3 | LDPTLEPYLDHFRHRMKRYVDQKMLIEKYEGPLEEFAQGYLKFGFNRE DG     | 150 |
| Rice BE1    | LDPKLEEFKDFNFYRIKRYLDQKCLIEKHEGGLEEF SKGYLKFGINTVDG     | 130 |
| Potato SBE3 | CIVYREWAPAAQEA EAVIGDFNGWNGSNHMM EKDFGVV SIRIPD VDSKPV  | 200 |
| Rice BE1    | ATIYREWAPAAQEAQLIGEFNNWNGAKHKMEKDKFGIWSIKISHVNGKPA      | 180 |
| Potato SBE3 | IPHNSRVKFRFKHGNVWVDRIPAWIKYATADATKFAAPYDGVYWDPPPS       | 250 |
| Rice BE1    | IPHNSKVKFRFRHGGGAWVDRIPAWIRYATFDASKFGAPYDGVHWDPPAC      | 230 |
| Potato SBE3 | ERYHFKYPRPPKPRAPRIYEAHVGMSSSEPRVNSYREFADDVLPRIKANN      | 300 |
| Rice BE1    | ERYVFKHPRPPKPDAPRIYEAHVGMSGEEPEVSTYREFADNVLPRIRANN      | 280 |
| Potato SBE3 | YNTVQLMAIMEHSYYGSFGYHVTNFFAVSNRYGNPEDLKYLIDKAHSLGL      | 350 |
| Rice BE1    | YNTVQLMAIMEHSYYASFGYHVTNFFAVSSRS GTPEDLKYLVDKAHSLGL     | 330 |
| Potato SBE3 | QVLVDVVHSHASNNTDGLNGFDIGQGSQESYFHAGERGYHKLWDSRFLN       | 400 |
| Rice BE1    | RVLMDVVHSHASNNTDGLNGYDVGNTHESYFHTGDRGYHKLWDSRFLN        | 380 |
| Potato SBE3 | YANWEVLRFLLSNLRWVLEEYNFDFGRFDGITSMLYVHHGINMGFTGNYN      | 450 |
| Rice BE1    | YANWEVLRFLLSNLRWVMEDEFMDFGRFDGVTSM LYHHHGINKGFTGN YK    | 430 |
| Potato SBE3 | EYFSEATDVDAVVYLM LANLIHKIFPDATVIAEDVSGMPGLSRPVSEGG      | 500 |
| Rice BE1    | EYFSLDTDVDAIVYMLLANHLMHKLLPEATIVAEDVSGMPVLCRPVDEGG      | 480 |
| Potato SBE3 | IGFDYRLAMAIPDKWIDYLNKNKDEDWSMKEVTSSLTNRRYTEKCIAYAE      | 550 |
| Rice BE1    | VGFDFRLAMAIPDRWIDYLNKNKEDRKWSMSEIVQTLTNRRYTEKCIAYAE     | 530 |
| Potato SBE3 | SHDQSI VGDKTIAFL LMDKEMYSGMSCLTDASPVVDRGIALHKMIHFFTM    | 600 |
| Rice BE1    | SHDQSI VGDKTIAFL LMDKEMYTGMSDLQPASPTINRGIALQKMIHFITM    | 580 |
| Potato SBE3 | ALGGEGYLNFMGNEFGHP EWIDFPREGNNWSYDKCRRQWNLADSEHLRYK     | 650 |
| Rice BE1    | ALGGDGYLNFMGNEFGHP EWIDFPREGNNWSYDKCRRQW SLVDTDH LRYK   | 630 |
| Potato SBE3 | FMNAFDRAMNSLDEKFSFLASGKQIVSSMDDD NKVVVFERGDLV FVFNFH    | 700 |
| Rice BE1    | YMNAFDQAMNALEEEFSFLSSSKQIVSDMNEKDKVIVFERGDLV FVFNFH     | 680 |
| Potato SBE3 | PNNTYEGYKVGCDLPGKYRVALDSDAWEFGGHGRAGHDVDHFTSPEGIPG      | 750 |
| Rice BE1    | PNKTYKGYKVGCDLPGKYRVALDSDALVFGGHGRVGHVDHFTSPEGMPG       | 730 |
| Potato SBE3 | VPETNFNGRPN SFKVLSPARTCVAYYRVDERMSE TEDYQTDICSELLPTA    | 800 |
| Rice BE1    | VPETNFNNRPN SFKVLSPRPTCVAYYRVDE DREELRRGGAVASGKIVTEY    | 780 |
| Potato SBE3 | NIEESDEKLDSSSTNISSTSKNAYYRVDERMSEAE DYQTDICSELLPT       | 850 |
| Rice BE1    | IDVEATSGETISGGWKSEKDDCGKKGKMFVFRSSEEDCK* 820            |     |
| Potato SBE3 | ANIEESDEKLDSSLSTNISNIGQTVVVSVEERDKELKDSPSVSIISDAVP      | 900 |
| Potato SBE3 | AEWADSDANVWGED* 914                                     |     |

Supplementary Figure. S3. Comparison of potato SBE3 and rice BE1. The deduced amino acid sequences of potato SBE3 (PGSC0003DMT400009981) and rice BE1 (BAF20543) were aligned. Identical amino acid residues are highlighted. Gaps are introduced to maximize the homology. Predicted transit peptides are indicated by red letters.
